# Supplementary material for: Convenient synthesis of α,β-unsaturated γ-butyrolactones and γ-butyrolactams via decarboxylative iodination of paraconic acids and β-carboxyl-γ-butyrolactams using 1,3-diiodo-5,5-dimethylhydantoin
Source: Royal Society of Chemistry journal article supplement (doi:10.1039/c5ob01574j), 2015-01-01

## Supporting Information

### Convenient Synthesis of $\alpha,\beta$ -Unsaturated $\gamma$ -Butyrolactones and $\gamma$ -Butyrolactams via Decarboxylative Iodination of Paraconic Acids and $\beta$ -Carboxyl- $\gamma$ -Butyrolactams Using 1,3-Diiodo-5,5-dimethylhydantoin

Supasorn Phae-nok, Chutima Kuhakarn, Manat Pohmakotr, Vichai Reutrakul, and Darunee Soorukram\*

*Department of Chemistry and Center of Excellence for Innovation in Chemistry (PERCH-CIC), Faculty of Science, Mahidol University, Rama VI Road, Bangkok 10400, Thailand*

*Fax: +662 354 7151; Tel: +662 201 5148*

*E-mail: darunee.soo@mahidol.ac.th*

## Contents

|                                                                                        | <b>Page</b> |
|----------------------------------------------------------------------------------------|-------------|
| $^1\text{H}$ and $^{13}\text{C}$ NMR spectra of compounds <b>3a–3j</b>                 | SI-2–SI-11  |
| $^1\text{H}$ , $^{13}\text{C}$ , and $^{19}\text{F}$ NMR spectra of compound <b>3k</b> | SI-12–SI-13 |
| $^1\text{H}$ and $^{13}\text{C}$ NMR spectra of compounds <b>3l–3x</b>                 | SI-14–SI-26 |

$^1\text{H}$  NMR spectrum of **3a** (400 MHz,  $\text{CDCl}_3$ )

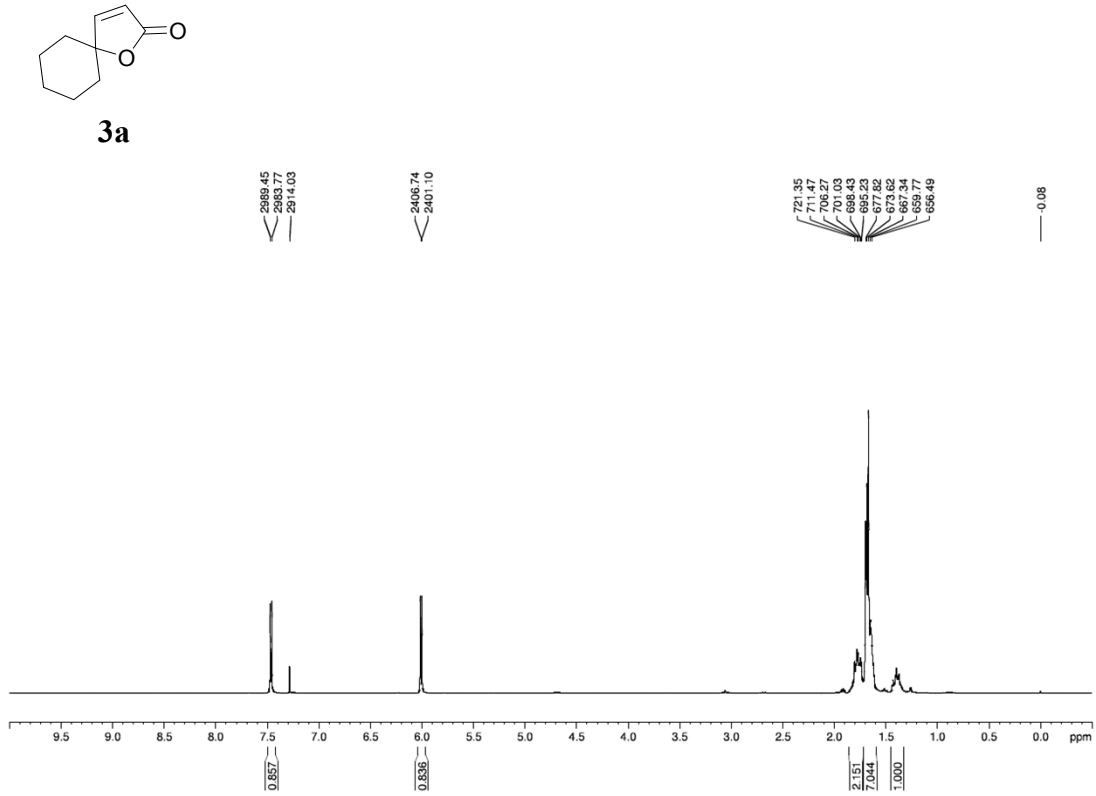

$^{13}\text{C}$  NMR spectrum of **3a** (100 MHz,  $\text{CDCl}_3$ )

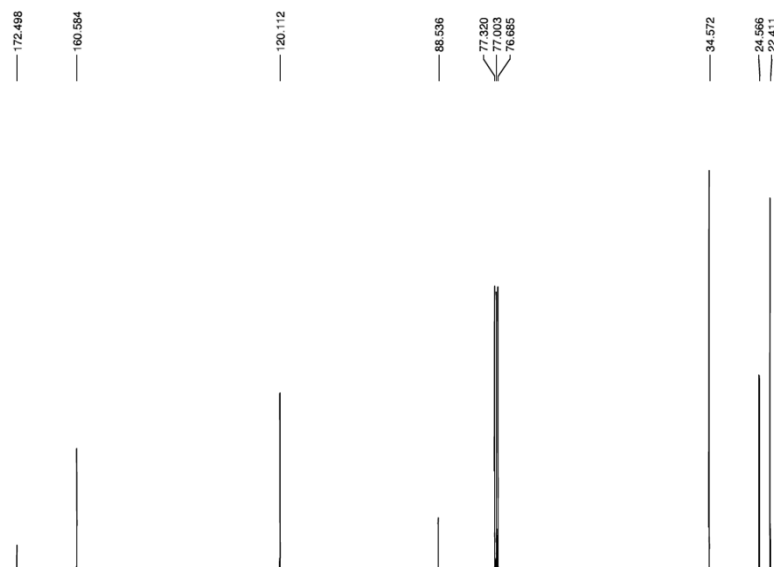

<sup>1</sup>H NMR spectrum of **3b** (400 MHz, CDCl<sub>3</sub>)

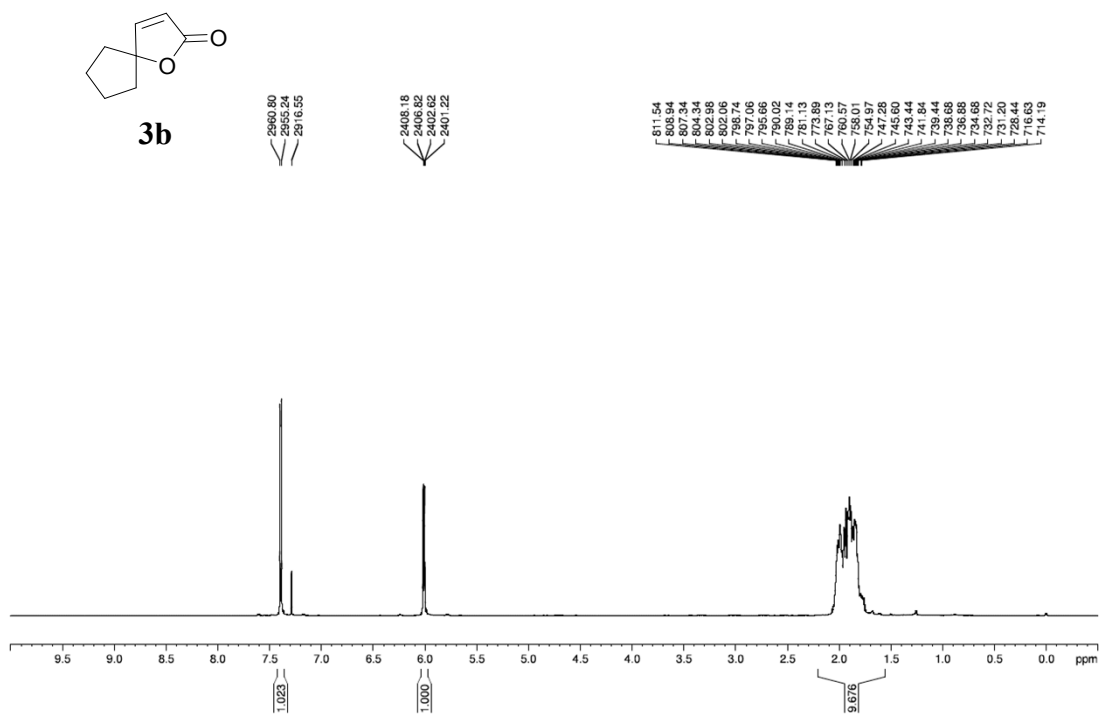

<sup>13</sup>C NMR spectrum of **3b** (100 MHz, CDCl<sub>3</sub>)

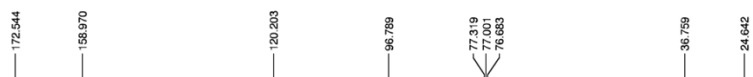



$^1\text{H}$  NMR spectrum of **3d** (400 MHz,  $\text{CDCl}_3$ )

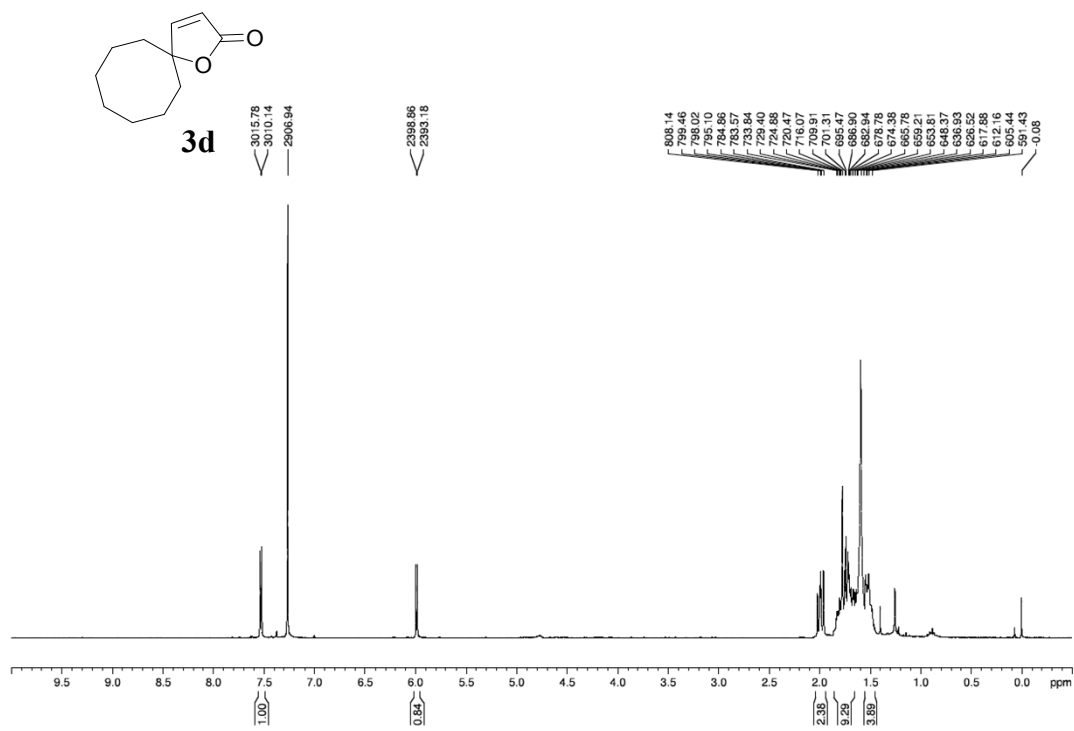

$^{13}\text{C}$  NMR spectrum of **3d** (100 MHz,  $\text{CDCl}_3$ )

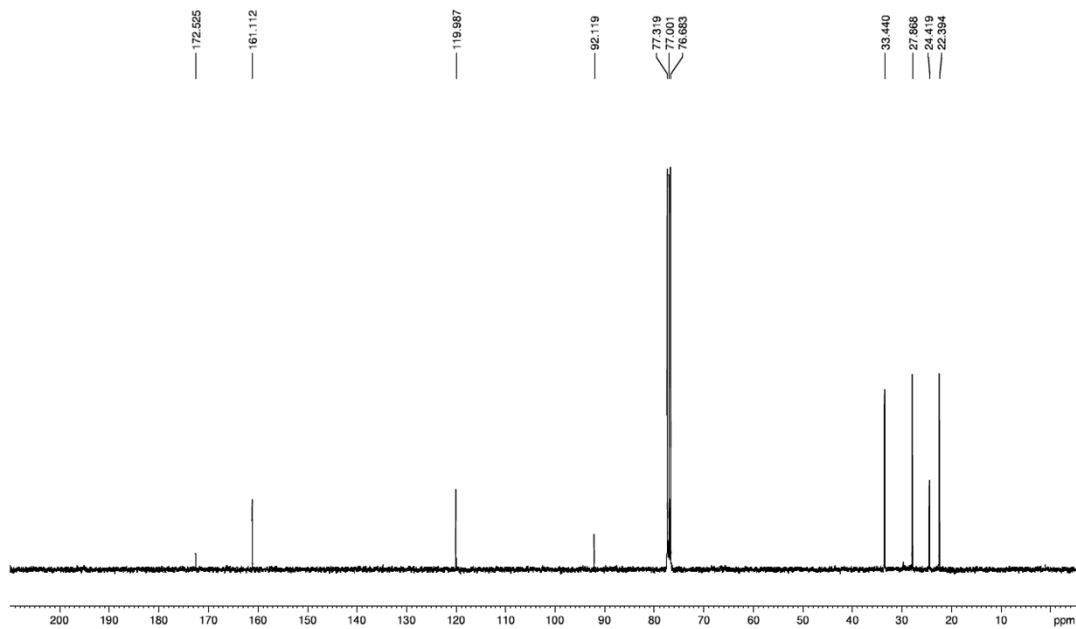

<sup>1</sup>H NMR spectrum of 3e (400 MHz, CDCl<sub>3</sub>)

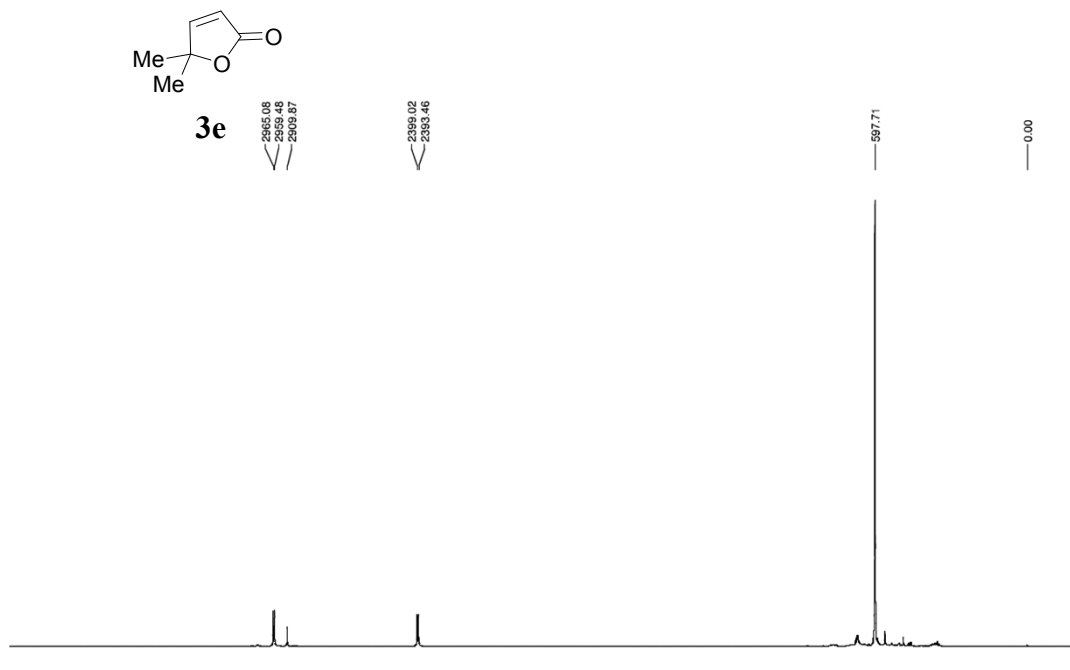

$^{13}\text{C}$  NMR spectrum of **3e** (100 MHz,  $\text{CDCl}_3$ )

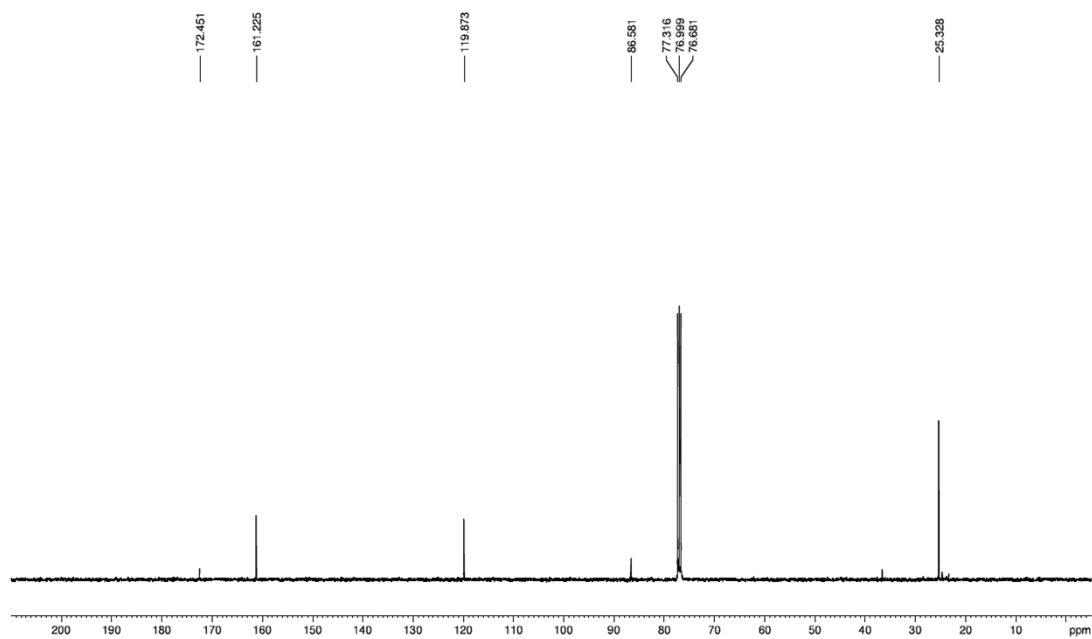

$^1\text{H}$  NMR spectrum of **3f** (400 MHz,  $\text{CDCl}_3$ )

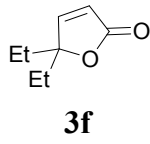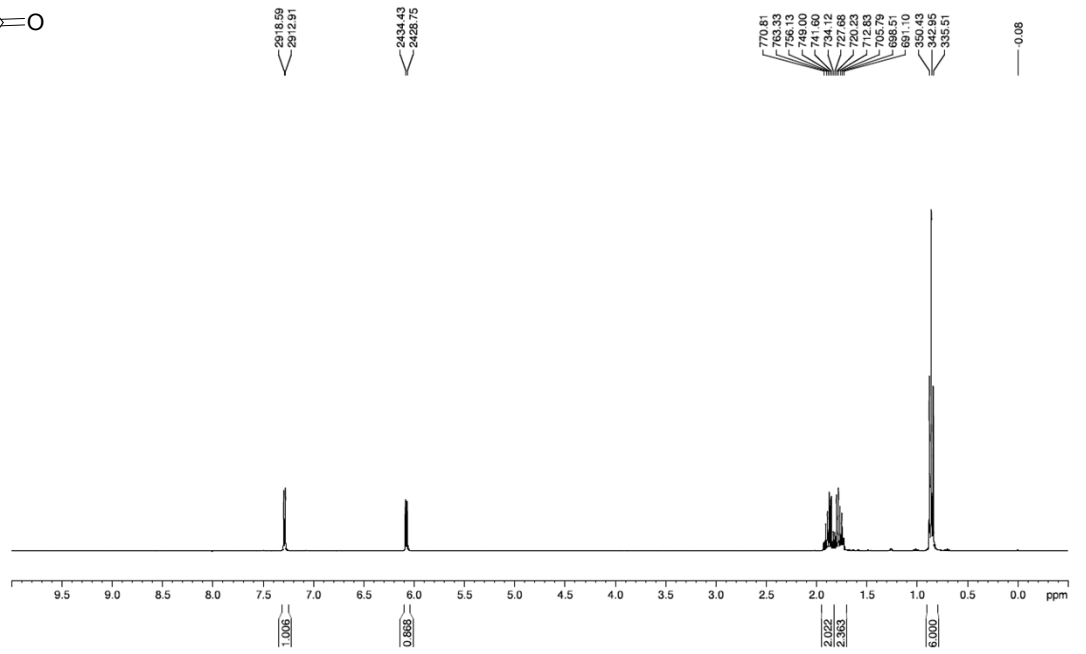

<sup>13</sup>C NMR spectrum of **3f** (100 MHz, CDCl<sub>3</sub>)

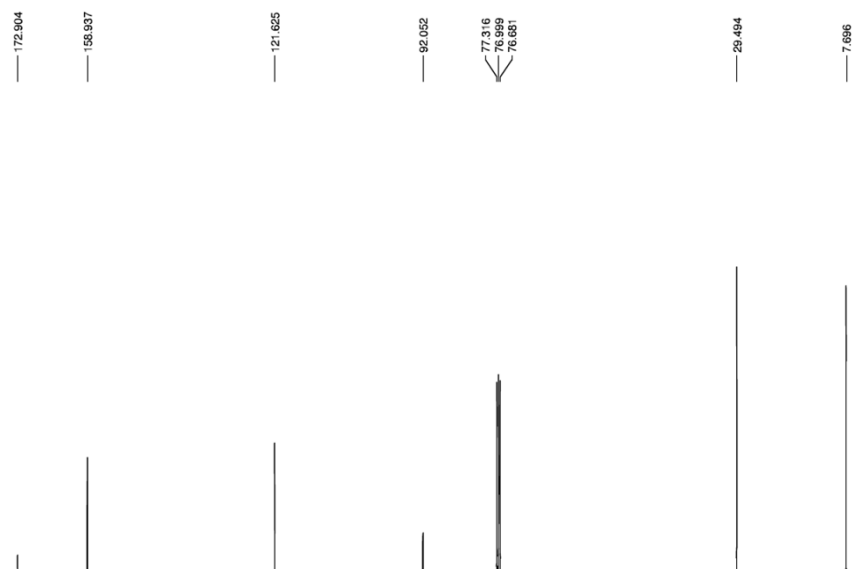



<sup>1</sup>H NMR spectrum of **3g** (400 MHz, CDCl<sub>3</sub>)

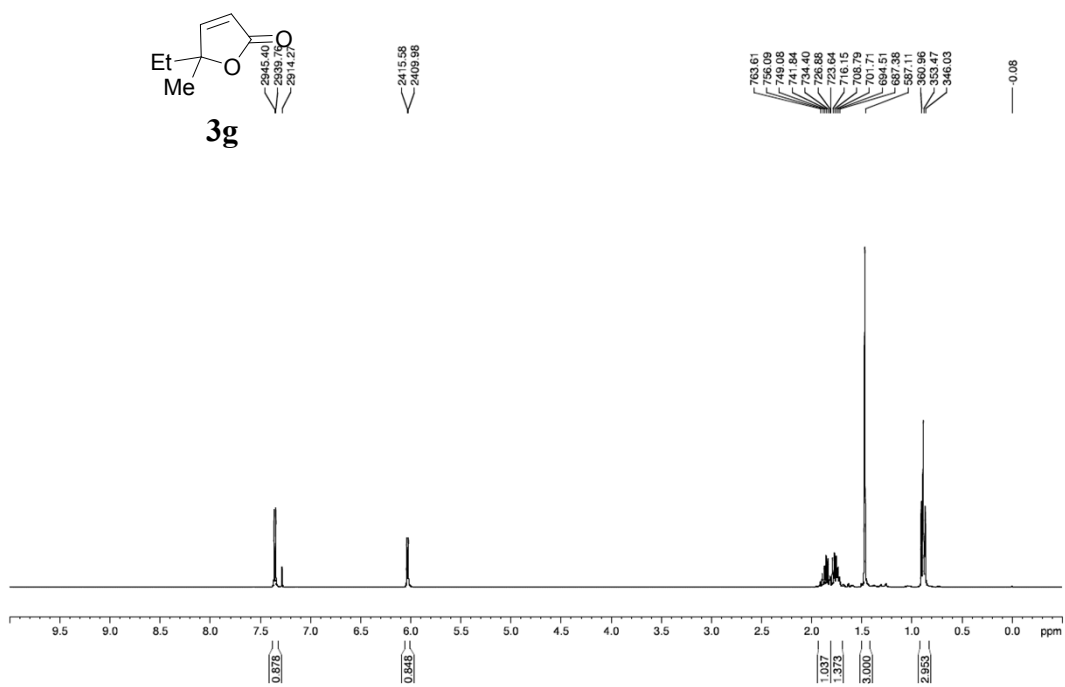

<sup>13</sup>C NMR spectrum of **3g** (100 MHz, CDCl<sub>3</sub>)

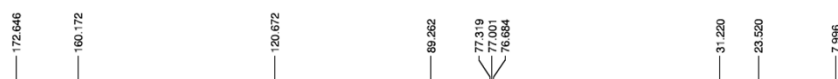

<sup>1</sup>H NMR spectrum of **3h** (400 MHz, CDCl<sub>3</sub>)

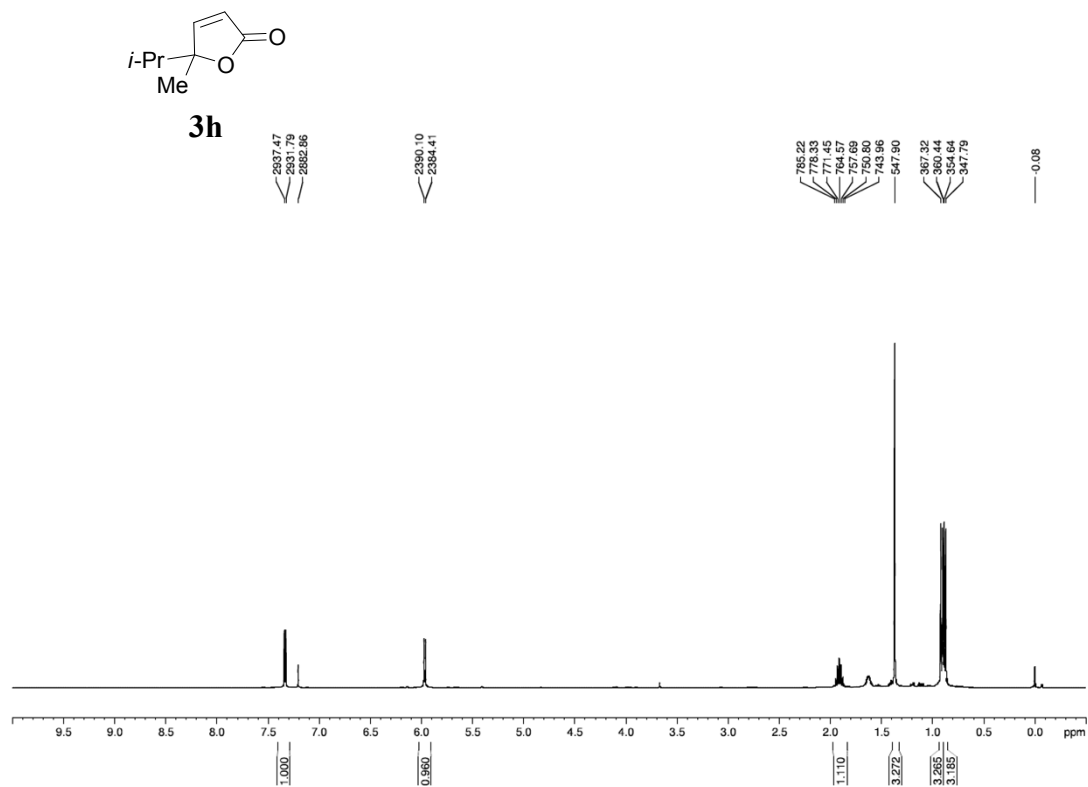

<sup>13</sup>C NMR spectrum of **3h** (100 MHz, CDCl<sub>3</sub>)

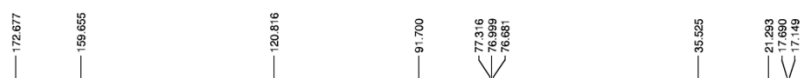





$^1\text{H}$  NMR spectrum of **3k** (400 MHz,  $\text{CDCl}_3$ )

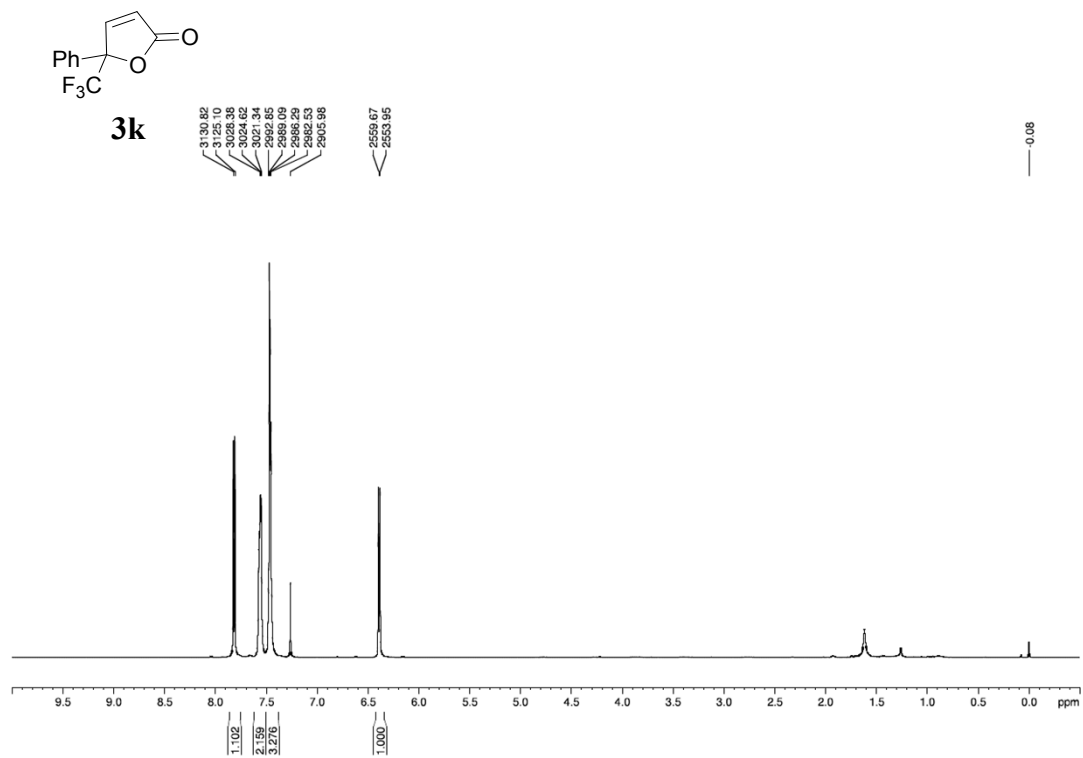

$^{13}\text{C}$  NMR spectrum of **3k** (100 MHz,  $\text{CDCl}_3$ )

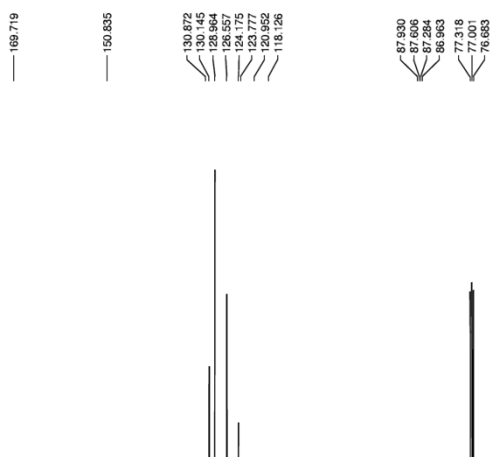

$^{19}\text{F}$  NMR spectrum of **3k** (376 MHz,  $\text{CDCl}_3$ )

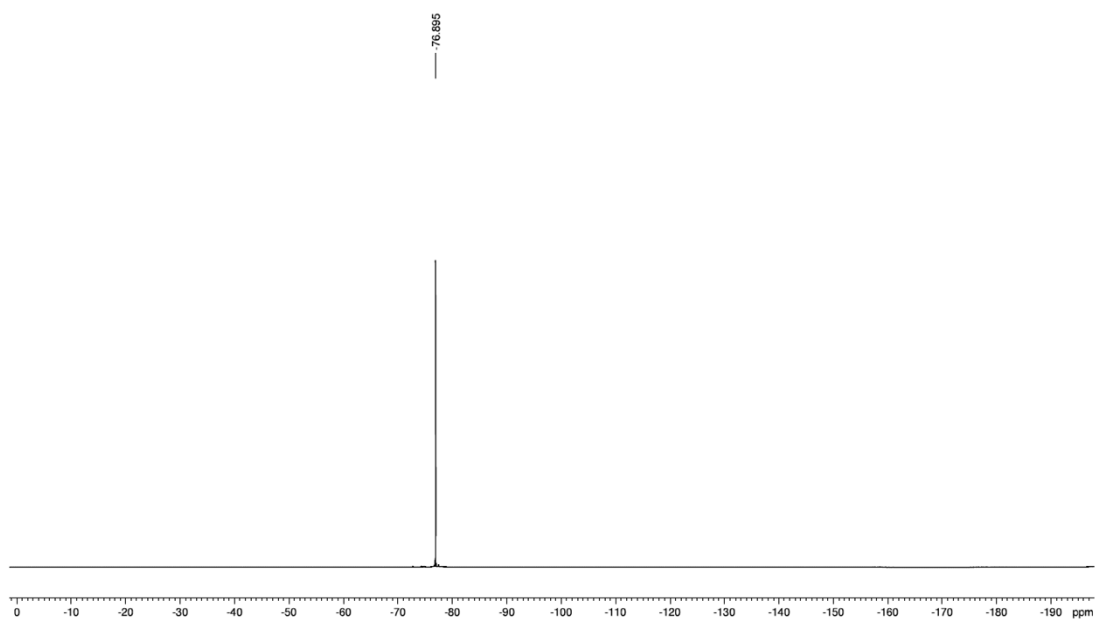

<sup>1</sup>H NMR spectrum of **3I** (400 MHz, CDCl<sub>3</sub>)

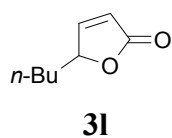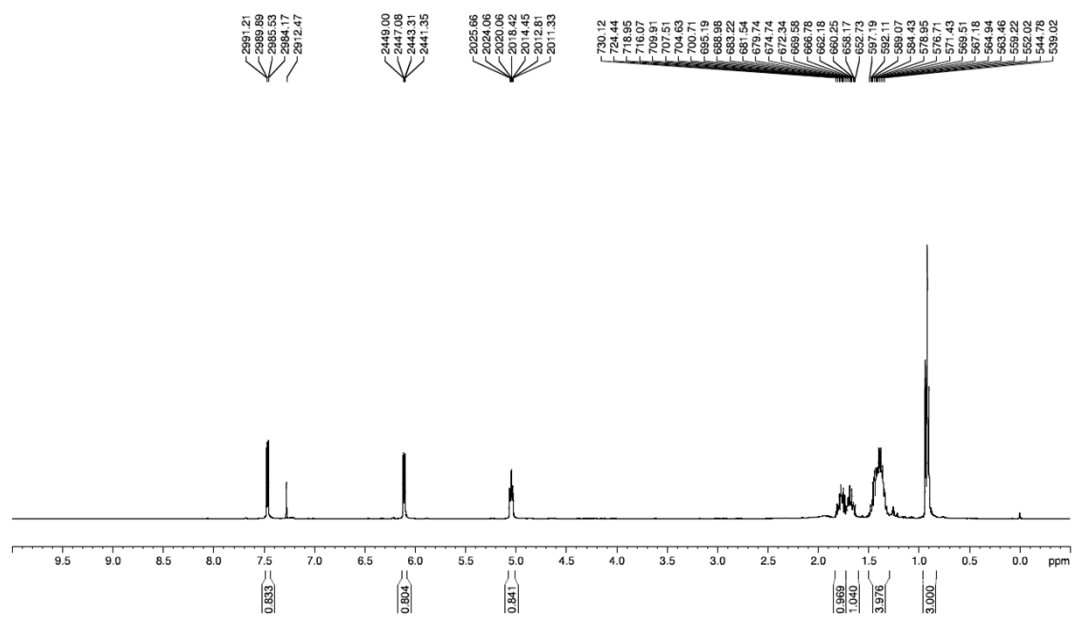

<sup>13</sup>C NMR spectrum of **3I** (100 MHz, CDCl<sub>3</sub>)





$^{13}\text{C}$  NMR spectrum of **3m** (100 MHz,  $\text{CDCl}_3$ )

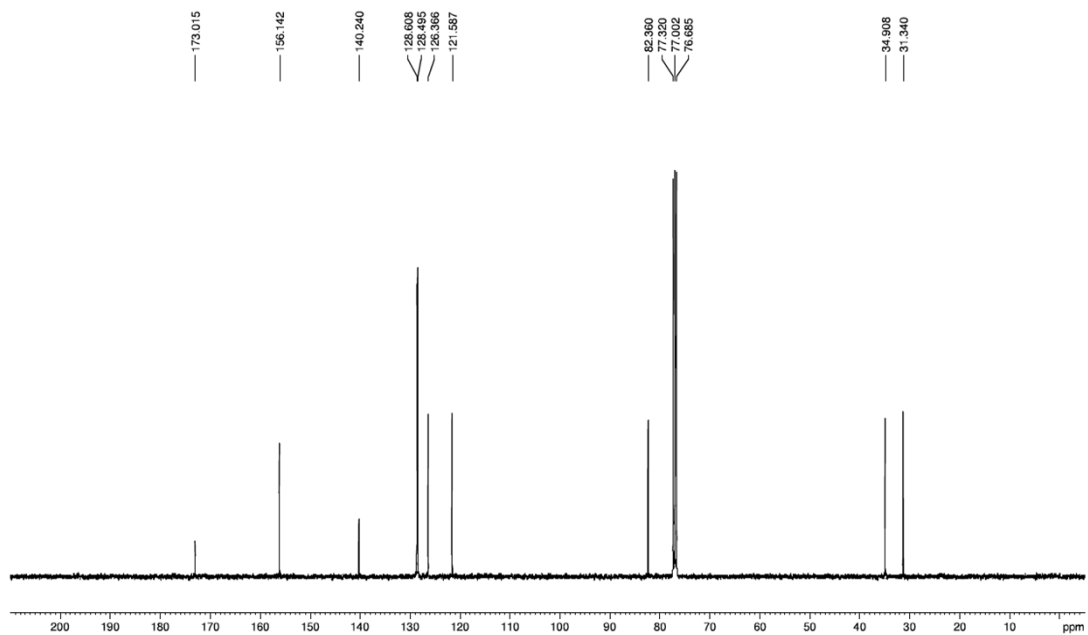

$^1\text{H}$  NMR spectrum of **3n** and **3n'** (400 MHz,  $\text{CDCl}_3$ )

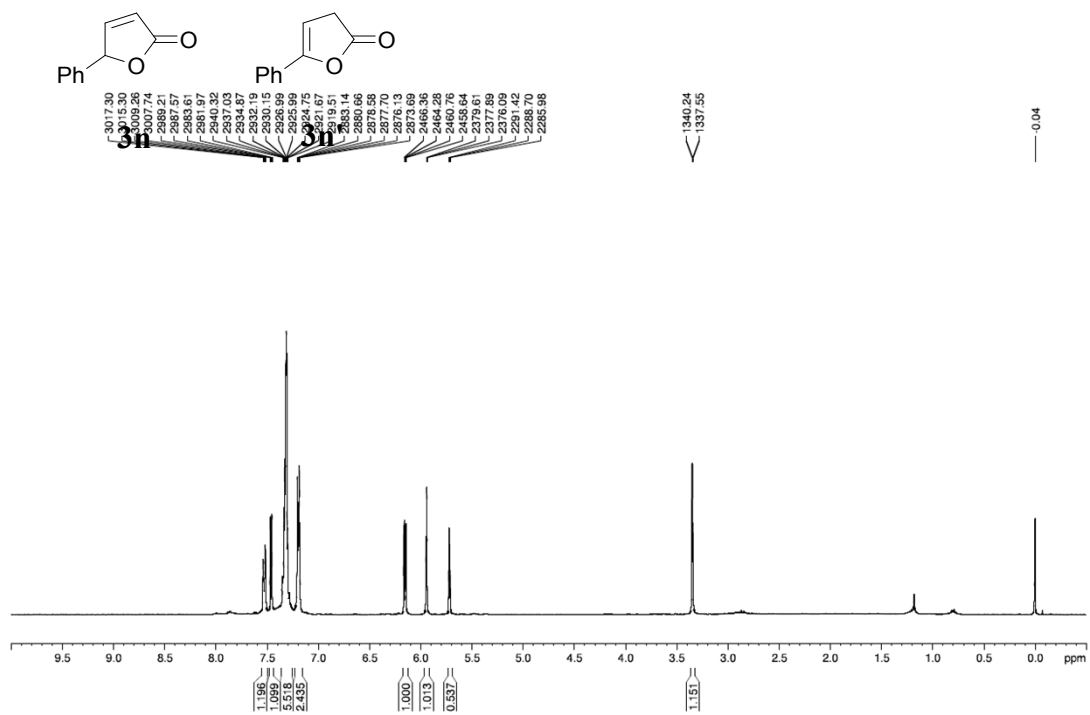

$^{13}\text{C}$  NMR spectrum of **3n** and **3n'** (100 MHz,  $\text{CDCl}_3$ )

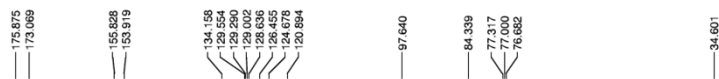



$^1\text{H}$  NMR spectrum of **3p** and **3p'** (400 MHz,  $\text{CDCl}_3$ )

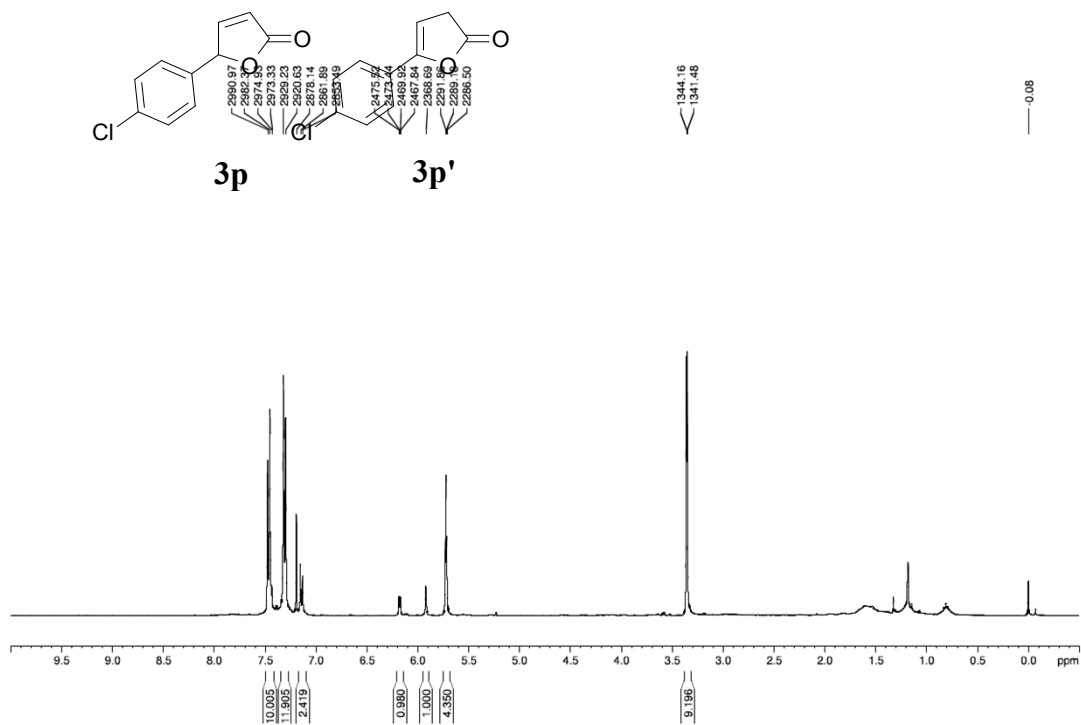

$^{13}\text{C}$  NMR spectrum of **3p** and **3p'** (100 MHz,  $\text{CDCl}_3$ )

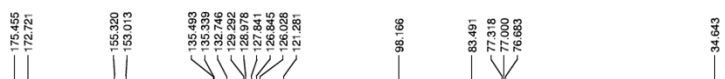





<sup>1</sup>H NMR spectrum of **3s** (400 MHz, CDCl<sub>3</sub>)

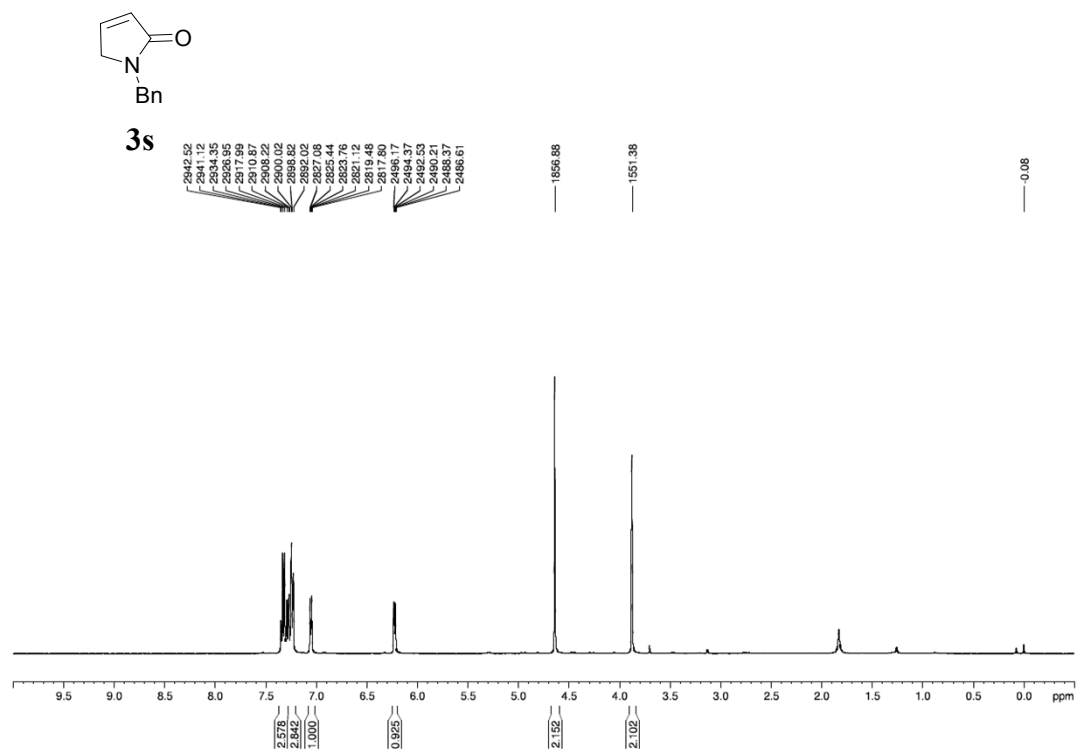

<sup>13</sup>C NMR spectrum of **3s** (100 MHz, CDCl<sub>3</sub>)

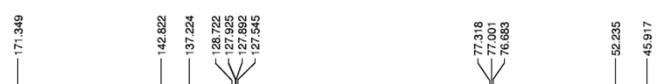

$^1\text{H}$  NMR spectrum of **3t** and **3t'** (400 MHz,  $\text{CDCl}_3$ )

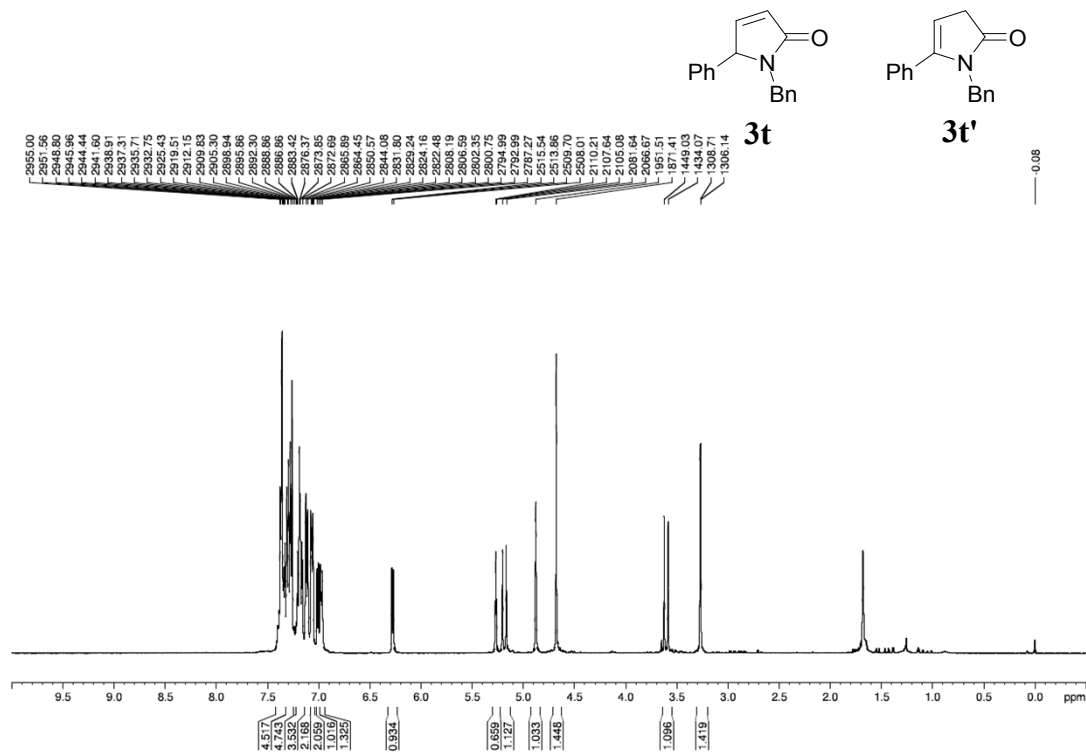

$^{13}\text{C}$  NMR spectrum of **3t** and **3t'** (100 MHz,  $\text{CDCl}_3$ )

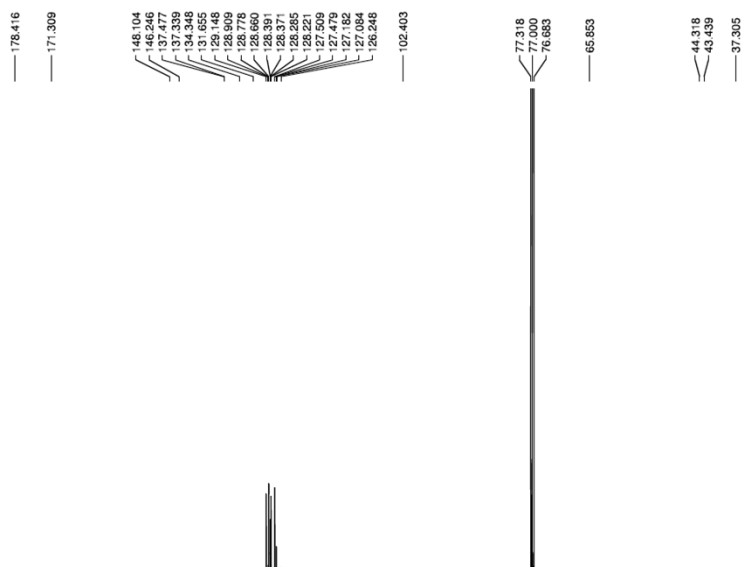





<sup>1</sup>H NMR spectrum of **3v** (400 MHz, CDCl<sub>3</sub>)

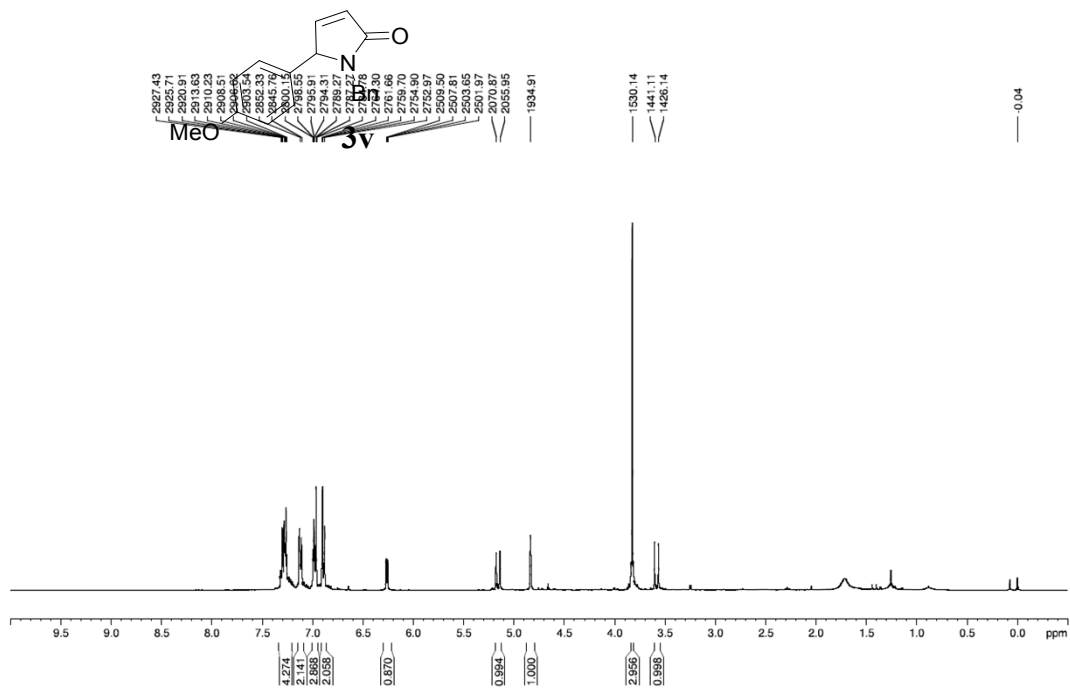

<sup>13</sup>C NMR spectrum of **3v** (100 MHz, CDCl<sub>3</sub>)

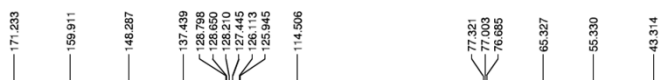

$^1\text{H}$  NMR  
(400 MHz,

spectrum of **3w**  
 $\text{CDCl}_3$ )

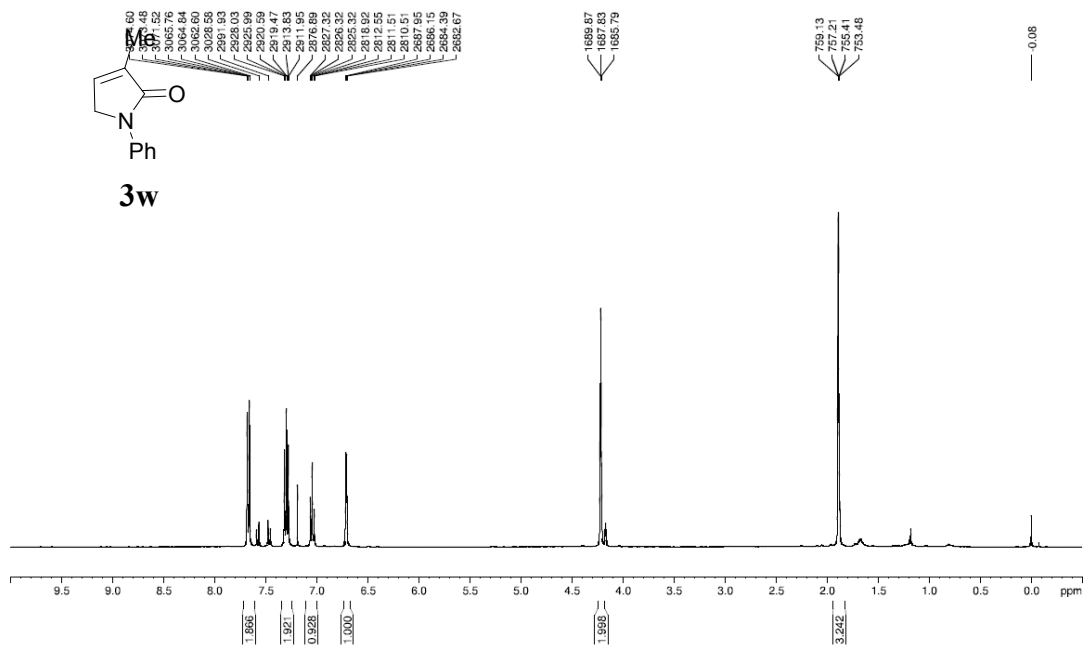

$^{13}\text{C}$  NMR spectrum of **3w** (100 MHz,  $\text{CDCl}_3$ )

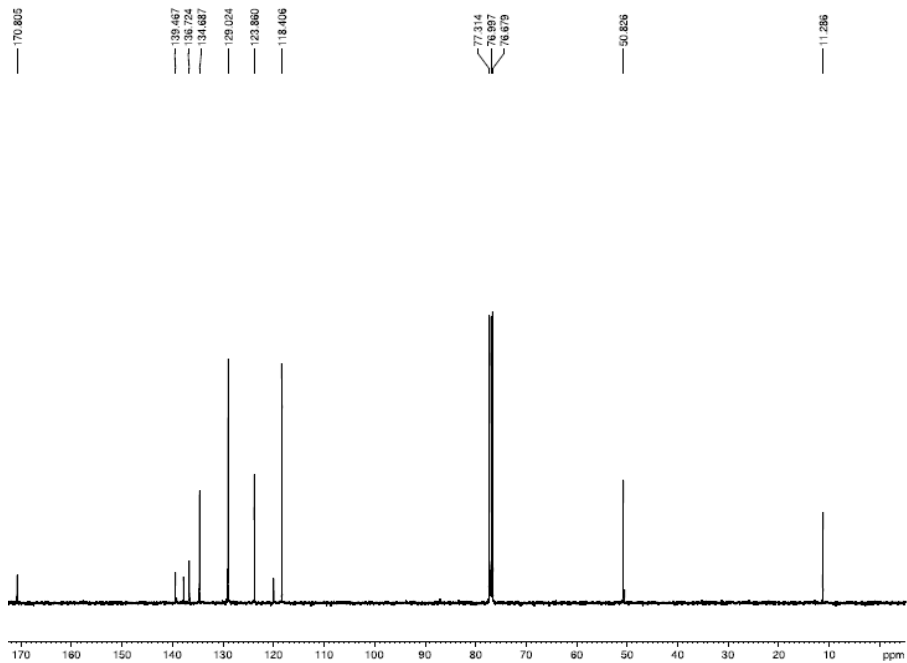

$^1\text{H}$  NMR spectrum of **3x** (400 MHz,  $\text{CDCl}_3$ )

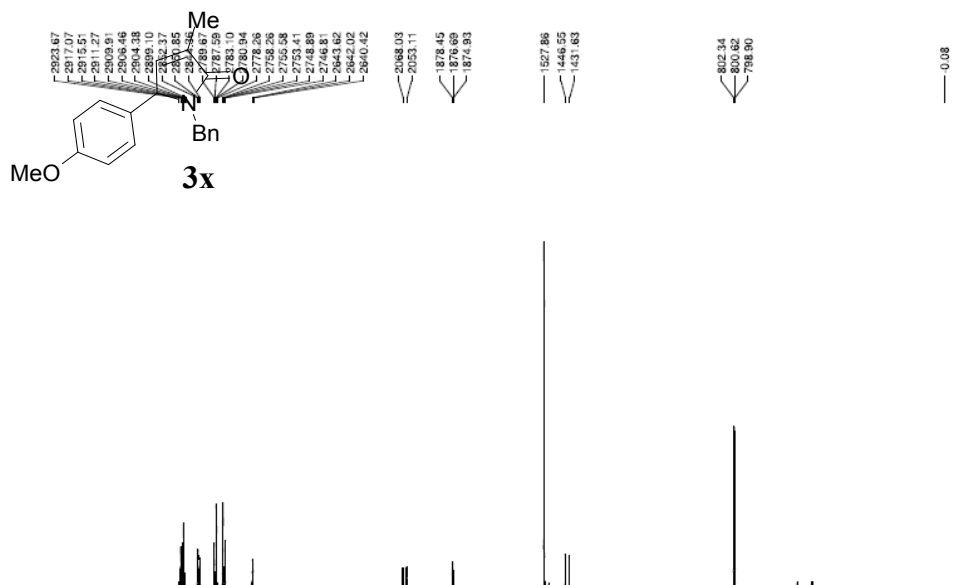

$^{13}\text{C}$  NMR spectrum of **3x** (100 MHz,  $\text{CDCl}_3$ )

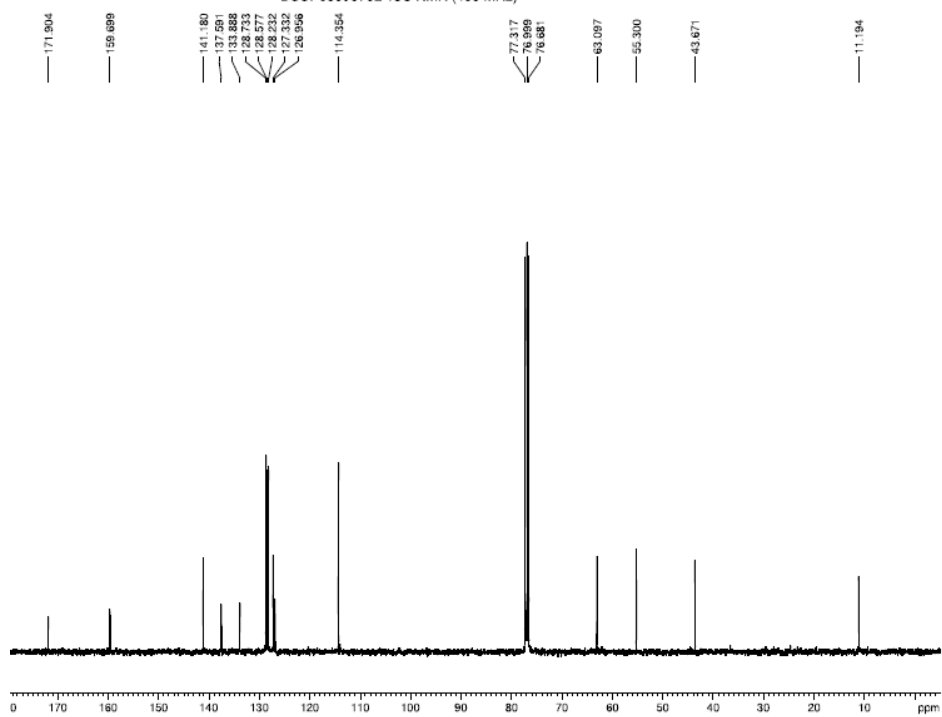

Supplement: c5ob01574j1.pdf [file c5ob01574j1.pdf]
